# Supplementary material
Source: publisher site journal article supplement (https://www.spandidos-publications.com/2005/downloadSupplementary)
Supplement: Supplementary file 1 [file downloadSupplementary]

Figure S1. Expression of RAB2A in siRNA-transfected BCSCs transfected with siRNAs. BCSCs were transfected with siRNA targeting RAB2A-targeting siRNAs (si-RAB2A#1 and si-RAB2A#2) or NC siRNA. At 48 h post-transfection, the expression of RAB2A was analysed via (A) reverse transcription-quantitative PCR and (B) western blotting. si-RAB2A#1 was used in Figs. 4 and 5. \*\* $P < 0.01$  and \*\*\* $P < 0.001$ . RAB2A, Ras-related protein Rab-2A; BCSC, breast cancer stem cell; siRNA, small interfering RNA; NC, negative control.

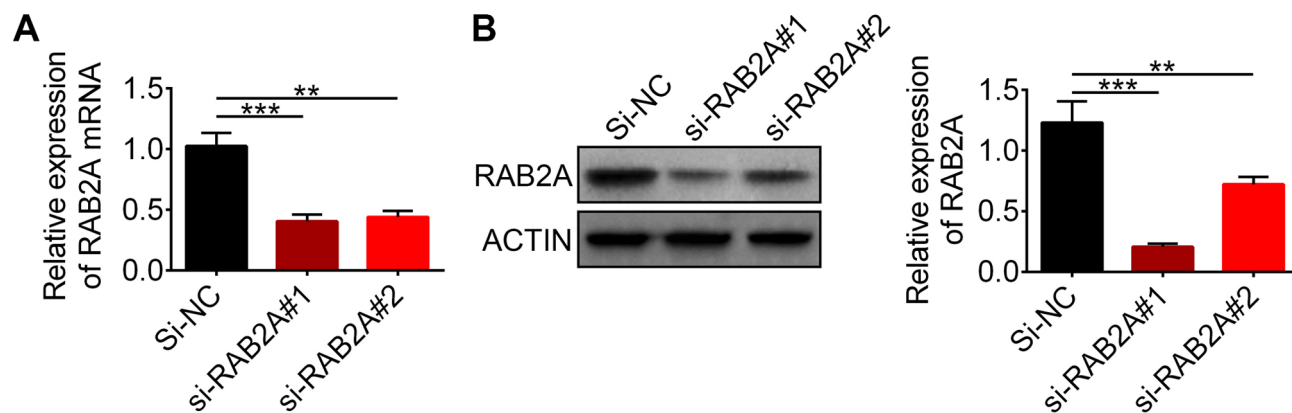

Figure S2. Expression of RAB2A in pcDNA-RAB2A-transfected BCSCs. BCSCs were transfected with pcDNA-RAB2A or pcDNA3.1. At 48 h post-transfection, RAB2A expression was assessed via western blotting. \*\*\* $P < 0.001$ . RAB2A, Ras-related protein Rab-2A; BCSC, breast cancer stem cell.

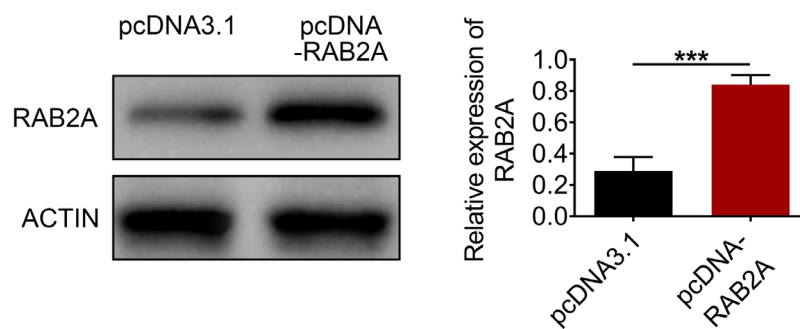

Table SI. Association between miR-376c-3p expression and the clinicopathological characteristics of patients (all female).

| Variable              | Cases (n=60) | miR-376c-3p expression |             | P-value |
|-----------------------|--------------|------------------------|-------------|---------|
|                       |              | Low (n=30)             | High (n=30) |         |
| Age (years)           |              |                        |             |         |
| ≤60                   | 34           | 18                     | 16          | 0.602   |
| >60                   | 26           | 12                     | 14          |         |
| ER status             |              |                        |             |         |
| Positive              | 25           | 13                     | 12          | 0.793   |
| Negative              | 35           | 17                     | 18          |         |
| PR status             |              |                        |             |         |
| Positive              | 32           | 12                     | 10          | 0.592   |
| Negative              | 28           | 18                     | 20          |         |
| HER2 status           |              |                        |             |         |
| Negative              | 27           | 14                     | 13          | 0.795   |
| Positive              | 33           | 16                     | 17          |         |
| Lymph node metastasis |              |                        |             |         |
| Yes                   | 19           | 15                     | 4           | 0.002   |
| No                    | 41           | 15                     | 26          |         |
| TNM stage             |              |                        |             |         |
| I + II                | 40           | 24                     | 16          | 0.028   |
| III                   | 20           | 6                      | 14          |         |

Data were analyzed using the  $\chi^2$  test. miR, microRNA; ER, oestrogen receptor; PR, progesterone receptor; HER2, human epidermal growth factor receptor 2.
